# Supplementary material
Source: publisher site journal article supplement (https://static.cambridge.org/content/id/urn:cambridge.org:id:article:S1368980019005305/resource/name/S1368980019005305supp001.docx)
Supplement: Supplementary file 1 [file S1368980019005305supp001.docx]

Additional Table 2: Quality assessment scores for qualitative studies. Yes- 2, Partial- 1, No- 0, Not applicable-NA

|  | **Question/ objective** | **Study design** | **Context** | **Theoretical framework** | **Sampling** | **Data collection** | **Data analysis** | **Verification procedure** | **Conclusions** | **Reflexivity** |
| --- | --- | --- | --- | --- | --- | --- | --- | --- | --- | --- |
| Batnitzky *et al.* (2008)(16) | **2** | **2** | **2** | **2** | **1** | **1** | **0** | **0** | **2** | **0** |
| Boatemaa *et al.* (2018)(17) | **2** | **2** | **2** | **2** | **1** | **2** | **2** | **0** | **2** | **0** |
| Brown *et al.* (2015)(18) | **2** | **2** | **2** | **2** | **2** | **2** | **2** | **0** | **2** | **0** |
| *Charlton *et al.* (2014)(59) | **2** | **1** | **1** | **2** | **1** | **2** | **1** | **0** | **2** | **0** |
| Craveriro *et al.* (2016)(19) | **1** | **2** | **2** | **1** | **2** | **2** | **2** | **2** | **2** | **0** |
| Draper *et al.* (2016)(20) | **1** | **2** | **2** | **2** | **2** | **2** | **2** | **2** | **2** | **0** |
| Legwegoh *et al.* (2012)(22), (2016)(22) | **1** | **2** | **2** | **2** | **2** | **2** | **1** | **0** | **1** | **0** |
| *Pradeilles (2015) (60) | **2** | **2** | **2** | **2** | **2** | **2** | **2** | **2** | **2** | **0** |
| Rguibi and Behalsen, 2006(23) | 2 | 2 | 1 | 2 | 1 | 1 | 0 | 0 | 2 | 0 |
| Sedibe *et al.* (2014)(24); Voorend *et al.* (2013)(25) | **2** | **2** | **2** | **2** | **2** | **2** | **2** | **2** | **2** | **0** |
| ***mixed methods study- scored here for qualitative component. Quality appraisal was conducted using**  **using a validated quality assessment tool(13).** | | | | | | | | | | |
